# Supplementary material
Source: Springer Nature journal article supplement (https://www.springermedizin.de/resource/supplementary/40345_2013_27_MOESM1_ESM.pdf/25658348)
Supplement: MOESM1 [file 25658348]

**Table 1. Evaluation Measures**

|                                            | Providers (n = 84) |              | People w/BD (n = 80) |              | Test                               |
|--------------------------------------------|--------------------|--------------|----------------------|--------------|------------------------------------|
|                                            | N                  | Valid % or M | N                    | Valid % or M |                                    |
| <b>Participant learned something new</b>   |                    |              |                      |              |                                    |
| Poor (1)                                   | 0                  | 0            | 2                    | 2.7          |                                    |
| Fair (2)                                   | 0                  | 0            | 2                    | 2.7          |                                    |
| Neutral (3)                                | 16                 | 20.3         | 26                   | 35.1         |                                    |
| Good (4)                                   | 42                 | 53.2         | 26                   | 35.1         |                                    |
| Excellent (5)                              | 21                 | 26.7         | 18                   | 24.3         |                                    |
| M (SD)                                     | 79                 | 4.06 (0.69)  | 74                   | 3.76 (0.95)  | $t(132)=2.27, p=.024$ <sup>a</sup> |
| <b>Teaching effectiveness of presenter</b> |                    |              |                      |              |                                    |
| Poor (1)                                   | 0                  | 0            | 0                    | 0            |                                    |
| Fair (2)                                   | 1                  | 1.3          | 0                    | 0            |                                    |
| Neutral (3)                                | 0                  | 0            | 5                    | 6.8          |                                    |
| Good (4)                                   | 11                 | 13.9         | 17                   | 23.0         |                                    |
| Excellent (5)                              | 67                 | 84.8         | 52                   | 70.3         |                                    |
| M (SD)                                     | 79                 | 4.82 (0.47)  | 74                   | 4.64 (0.61)  | $t(138)=2.12, p=.036$ <sup>a</sup> |
| <b>Emotional impact on participant</b>     |                    |              |                      |              |                                    |
| Poor (1)                                   | 0                  | 0            | 0                    | 0            |                                    |
| Fair (2)                                   | 0                  | 0            | 3                    | 4.2          |                                    |
| Neutral (3)                                | 7                  | 9.0          | 3                    | 4.2          |                                    |
| Good (4)                                   | 20                 | 25.6         | 28                   | 38.9         |                                    |
| Excellent (5)                              | 51                 | 65.4         | 38                   | 52.8         |                                    |
| M (SD)                                     | 78                 | 4.56 (0.66)  | 72                   | 4.40 (0.76)  | $t(148) = 1.39, p = .166$          |
| <b>Length of event</b>                     |                    |              |                      |              |                                    |
| Poor (1)                                   | 0                  | 0            | 1                    | 1.4          |                                    |
| Fair (2)                                   | 1                  | 1.3          | 1                    | 1.4          |                                    |
| Neutral (3)                                | 4                  | 5.1          | 7                    | 9.5          |                                    |
| Good (4)                                   | 21                 | 26.6         | 31                   | 41.9         |                                    |
| Excellent (5)                              | 53                 | 67.1         | 34                   | 45.9         |                                    |
| M (SD)                                     | 79                 | 4.59 (0.65)  | 74                   | 4.30 (0.81)  | $t(151) = 2.52, p = .013$          |

|                                                              | Providers (n = 84) |              | People w/BD (n = 80) |              | Test                        |
|--------------------------------------------------------------|--------------------|--------------|----------------------|--------------|-----------------------------|
|                                                              | N                  | Valid % or M | N                    | Valid % or M |                             |
| <b>Overall satisfaction with content of event</b>            |                    |              |                      |              |                             |
| Poor (1)                                                     | 0                  | 0            | 1                    | 1.4          |                             |
| Fair (2)                                                     | 0                  | 0            | 1                    | 1.4          |                             |
| Neutral (3)                                                  | 0                  | 0            | 4                    | 5.4          |                             |
| Good (4)                                                     | 20                 | 25.3         | 19                   | 25.7         |                             |
| Excellent (5)                                                | 79                 | 74.7         | 49                   | 66.2         |                             |
| M (SD)                                                       | 79                 | 4.75 (0.44)  | 74                   | 4.54 (0.78)  | $t(113) = 2.00, p = .048^a$ |
| <b>Overall rating of event</b>                               |                    |              |                      |              |                             |
| Poor (1)                                                     | 0                  | 0            | 1                    | 1.4          |                             |
| Fair (2)                                                     | 0                  | 0            | 0                    | 0            |                             |
| Neutral (3)                                                  | 1                  | 1.3          | 2                    | 2.7          |                             |
| Good (4)                                                     | 19                 | 24.1         | 21                   | 28.4         |                             |
| Excellent (5)                                                | 59                 | 74.7         | 50                   | 67.6         |                             |
| M (SD)                                                       | 79                 | 4.73 (0.47)  | 74                   | 4.61 (0.68)  | $t(129) = 1.33, p = .188^a$ |
| <b>Could event change public acceptance of BD</b>            |                    |              |                      |              |                             |
| No                                                           | 0                  | 0            | 1                    | 1.9          |                             |
| Somewhat                                                     | 11                 | 13.8         | 10                   | 18.5         |                             |
| Yes                                                          | 69                 | 86.3         | 43                   | 79.6         |                             |
| <b>Could event change non-MH providers' acceptance of BD</b> |                    |              |                      |              |                             |
| No                                                           | 0                  | 0            | na                   | na           |                             |
| Somewhat                                                     | 15                 | 18.5         | na                   | na           |                             |
| Yes                                                          | 65                 | 81.3         | na                   | na           |                             |
| <b>Could event change MH providers' acceptance of</b>        |                    |              |                      |              |                             |

|                                                        | Providers (n = 84) |              | People w/BD (n = 80) |              | Test |
|--------------------------------------------------------|--------------------|--------------|----------------------|--------------|------|
|                                                        | <i>N</i>           | Valid % or M | <i>N</i>             | Valid % or M |      |
| <b>BD</b>                                              |                    |              |                      |              |      |
| No                                                     | 1                  | 1.3          | na                   | na           |      |
| Somewhat                                               | 16                 | 20.0         | na                   | na           |      |
| Yes                                                    | 63                 | 78.8         | na                   | na           |      |
| <b>Did event change participants' acceptance of BD</b> |                    |              |                      |              |      |
| No                                                     | 24                 | 30.4         | 20                   | 37.0         |      |
| Somewhat                                               | 18                 | 22.8         | 14                   | 25.9         |      |
| Yes                                                    | 37                 | 46.8         | 20                   | 37.0         |      |

<sup>a</sup> Unequal variance *t*-test
